# Supplementary material
Source: ML conference proceedings conference paper supplement (https://openreview.net/forum?id=pBFVoll8Xa)
Supplement: supplementary_material [file additional_results.pdf › additional_results.pdf]

## Supplementary Material

Table 10: **Updated: We fill addition results from Qwen3-Instruct (non-think).** Accuracy comparison of our GENERAL-REASONER with baseline methods on general reasoning benchmarks. MMLU-Pro, SuperGPQA, TheoremQA and BBEH contain multiple subfields.

| Model Name<br>Metric           | Backbone         | MMLU-Pro<br>Micro | GPQA-D<br>Acc | SuperGPQA<br>Macro (discipline) | TheoremQA<br>Acc | BBEH<br>Micro |
|--------------------------------|------------------|-------------------|---------------|---------------------------------|------------------|---------------|
| MiMo-RL                        | MiMo-Base        | 58.6              | 54.4          | 40.5                            | 38.8             | 11.4          |
| QwQ-32B                        | Qwen2.5-32B-Inst | 52.0              | 54.5          | 43.6                            | 48.4             | 22.6          |
| GPT-4o                         | -                | 74.6              | 50.0          | 46.3                            | 43.6             | 22.3          |
| o1-mini                        | -                | 80.3              | 60.0          | 45.2                            | 53.1             | -             |
| DeepSeek-R1                    | DeepSeek-V3      | 84.0              | 71.5          | 59.9                            | 59.1             | 34.9          |
| 4B Models                      |                  |                   |               |                                 |                  |               |
| Qwen3-4B-Base                  | -                | 51.6              | 26.3          | 25.4                            | 34.8             | 8.1           |
| Qwen3-4B-Instruct (non-think)  | Qwen3-4B-Base    | 61.8              | 41.7          | 32.1                            | 42.0             | <b>14.9</b>   |
| GENERAL-REASONER-4B            | Qwen3-4B-Base    | <b>62.8</b>       | <b>42.9</b>   | <b>32.5</b>                     | <b>48.3</b>      | 12.2          |
| 7B Models                      |                  |                   |               |                                 |                  |               |
| Qwen2.5-7B-Base                | -                | 47.7              | 29.3          | 26.7                            | 29.1             | 8.0           |
| Qwen2.5-7B-Instruct            | Qwen2.5-7B-Base  | 57.0              | 33.8          | 30.7                            | 36.6             | 12.2          |
| Open-Reasoner-Zero             | Qwen2.5-7B-Base  | <b>59.4</b>       | 36.6          | 32.8                            | 37.4             | 12.2          |
| Nemotron-CrossThink            | Qwen2.5-7B-Base  | 57.8              | 38.5          | 29.1                            | -                | -             |
| SimpleRL-Qwen2.5-7B-Zoo        | Qwen2.5-7B-Base  | 51.5              | 24.2          | 29.9                            | 38.0             | 11.9          |
| GENERAL-REASONER-7B            | Qwen2.5-7B-Base  | 58.9              | <b>38.8</b>   | <b>34.2</b>                     | <b>45.3</b>      | <b>12.5</b>   |
| 14B Models                     |                  |                   |               |                                 |                  |               |
| Qwen2.5-14B-Base               | -                | 53.3              | 32.8          | 30.7                            | 33.0             | 10.8          |
| Qwen2.5-14B-Instruct           | Qwen2.5-14B-Base | 62.7              | 41.4          | 35.8                            | 41.9             | 15.2          |
| SimpleRL-Qwen2.5-14B-Zoo       | Qwen2.5-14B-Base | 64.0              | 39.4          | 35.7                            | 40.8             | 13.6          |
| GENERAL-REASONER-Qw2.5-14B     | Qwen2.5-14B-Base | 66.6              | 43.4          | 39.5                            | 44.3             | 15.2          |
| Qwen3-14B-Base                 | -                | 64.2              | 45.9          | 36.5                            | 44.0             | 13.0          |
| Qwen3-14B-Instruct (non-think) | Qwen3-14B-Base   | <b>70.9</b>       | 54.8          | 39.8                            | 42.4             | <b>19.2</b>   |
| GENERAL-REASONER-Qw3-14B       | Qwen3-14B-Base   | 70.3              | <b>56.1</b>   | <b>39.9</b>                     | <b>54.4</b>      | 17.3          |

Table 11: **Updated: We fill addition results from Qwen3-Instruct (non-think).** Math task accuracy across datasets. Most evaluations are based on greedy decoding except for AIME24 and AIME25 (averaged over 32 sampling runs following SimpleRL [2]).

| Model Name                     | AVG         | MATH-500    | Olympiad    | Minerva     | GSM8K       | AMC         | AIME24      | AIME25      |
|--------------------------------|-------------|-------------|-------------|-------------|-------------|-------------|-------------|-------------|
| 4B Models                      |             |             |             |             |             |             |             |             |
| Qwen3-4B-Base                  | 22.5        | 38.8        | 16.4        | 18.4        | 39.6        | 27.5        | 10.3        | 6.7         |
| Qwen3-4B-Instruct (non-think)  | <b>54.2</b> | 80.4        | <b>49.0</b> | 57.0        | 92.0        | <b>62.5</b> | <b>22.5</b> | <b>16.1</b> |
| GENERAL-REASONER-4B            | 53.4        | <b>80.6</b> | 47.7        | <b>57.7</b> | <b>92.2</b> | 60.0        | 20.0        | 15.4        |
| 7B Models                      |             |             |             |             |             |             |             |             |
| Qwen2.5-7B-Base                | 34.7        | 60.2        | 28.6        | 36.0        | 83.1        | 30.0        | 3.8         | 1.4         |
| Qwen2.5-7B-Instruct            | 46.3        | 75.0        | 39.4        | 45.2        | 90.9        | 52.5        | 12.5        | 8.5         |
| SimpleRL-Qwen2.5-7B-Zoo        | 48.4        | 74.0        | <b>41.9</b> | 49.6        | 90.7        | <b>60.0</b> | <b>15.2</b> | 7.5         |
| GENERAL-REASONER-7B            | <b>48.5</b> | <b>76.0</b> | 37.9        | <b>54.0</b> | <b>92.7</b> | 55.0        | 13.8        | <b>10.4</b> |
| 14B Models                     |             |             |             |             |             |             |             |             |
| Qwen2.5-14B-Base               | 37.0        | 65.4        | 33.5        | 24.3        | 91.6        | 37.5        | 3.6         | 2.9         |
| Qwen2.5-14B-Instruct           | 49.9        | 77.4        | 44.7        | 52.2        | <b>94.5</b> | 57.5        | 12.2        | 11.0        |
| SimpleRL-Qwen2.5-14B-Zoo       | 50.7        | 77.2        | 44.6        | 54.0        | 94.2        | 60.0        | 12.9        | 11.8        |
| GENERAL-REASONER-Qw2.5-14B     | 53.9        | 78.6        | 42.1        | 58.1        | 94.2        | 70.0        | 17.5        | 16.9        |
| Qwen3-14B-Base                 | 49.9        | 74.6        | 44.3        | 55.9        | 93.2        | 55.0        | 14.7        | 11.4        |
| Qwen3-14B-Instruct (non-think) | 57.0        | 82.0        | <b>52.4</b> | 59.9        | 93.9        | 57.5        | <b>28.5</b> | <b>25.1</b> |
| GENERAL-REASONER-Qw3-14B       | <b>58.8</b> | <b>83.8</b> | 51.9        | <b>68.0</b> | <b>94.4</b> | <b>70.0</b> | 24.4        | 19.2        |
